# Supplementary material for: Guide RNA Repertoires in the Main Lineages of Trypanosoma cruzi: High Diversity and Variable Redundancy Among Strains
Source: PubMed Central journal article supplement (PMC8202002; doi:10.3389/fcimb.2021.663416), 2021-05-31
Supplement: DataSheet_3.pdf [file DataSheet_3.pdf]

## Supplementary Material

### 1 Supplementary Figures and Tables

#### 1.1 Supplementary Figures

### Step 1. Building the Hash-Table

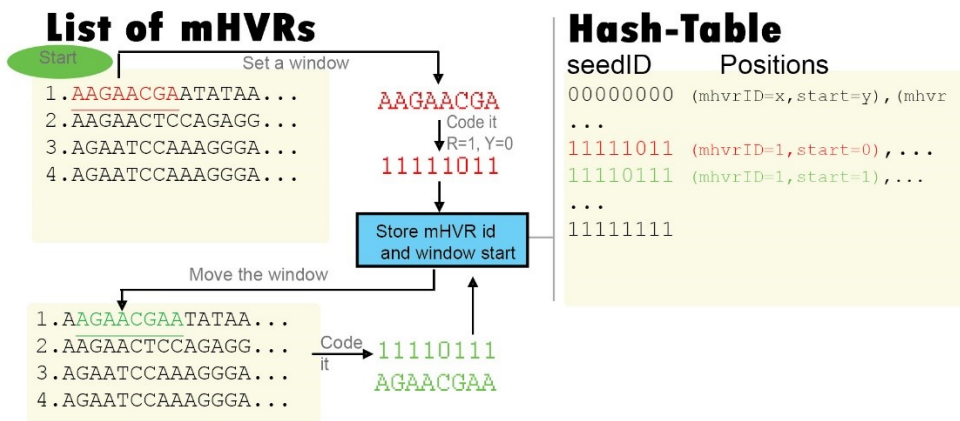

### Step 2. Searching gRNAs

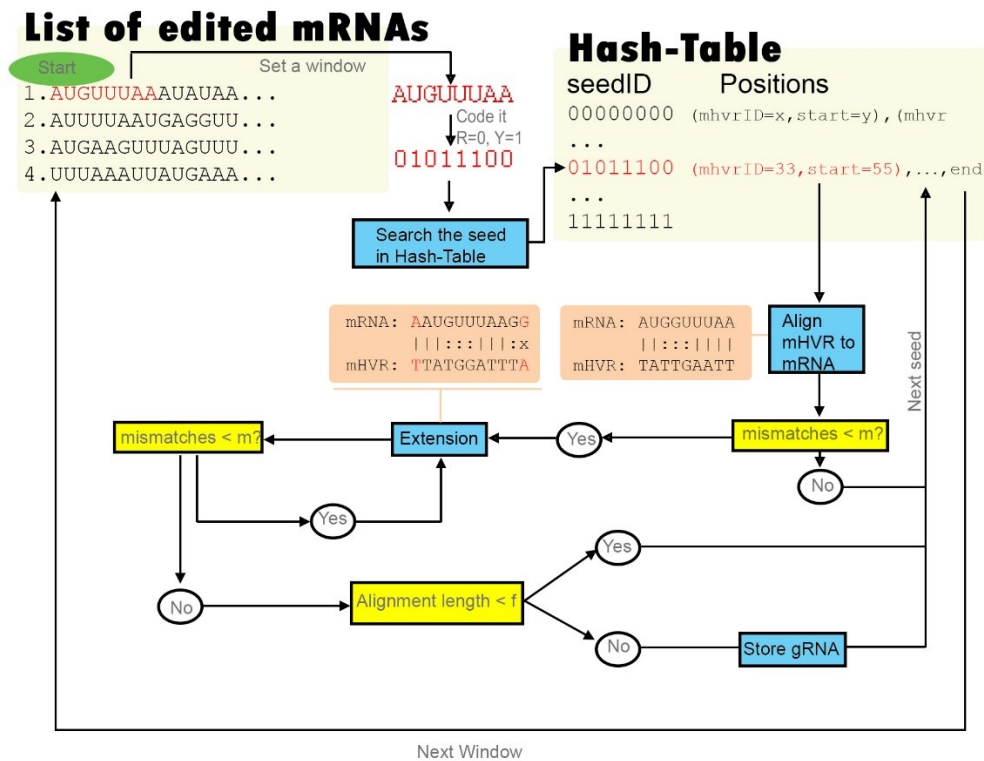

Figure S1. Algorithm scheme for detecting gRNAs on mHVRs (paired-end and merged reads).

### Step 3. Clustering gRNAs

#### gRNA list (aligned to a mRNA)

mRNA AUGUUUUAGUACUUUGA...  
 elements  
 gRNA1 TACGAGATT...  
 gRNA2 TGGAATTUA...  
 gRNA3 TGAAATTUA...

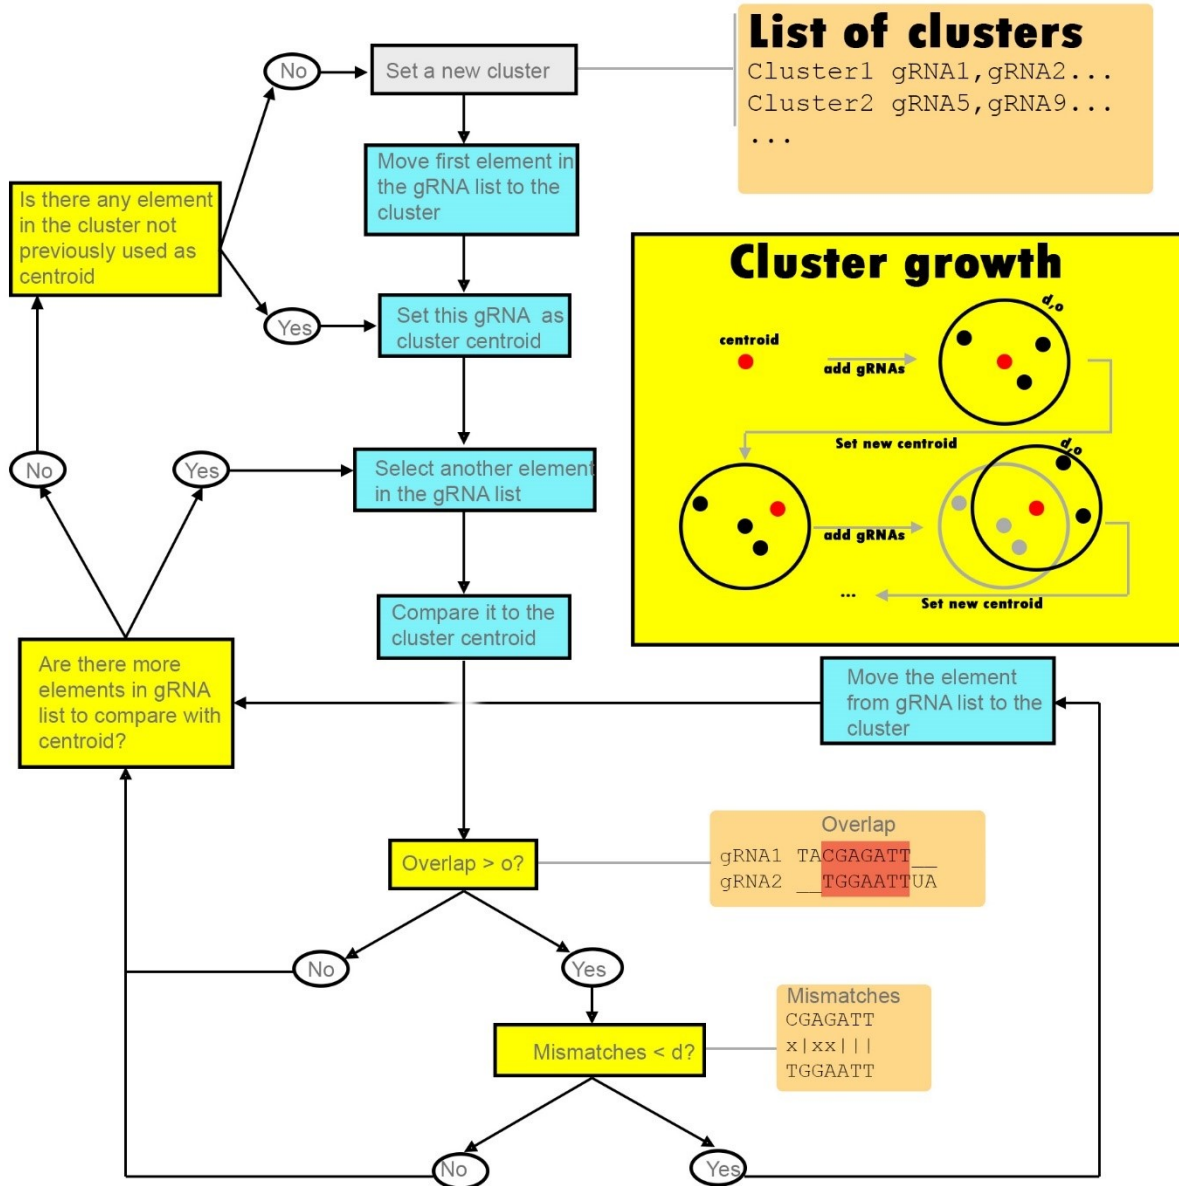

**Figure S2.** Swarm-like algorithm used to cluster gRNAs according to percentage of sequence overlapping (o) and number of mismatches (d).

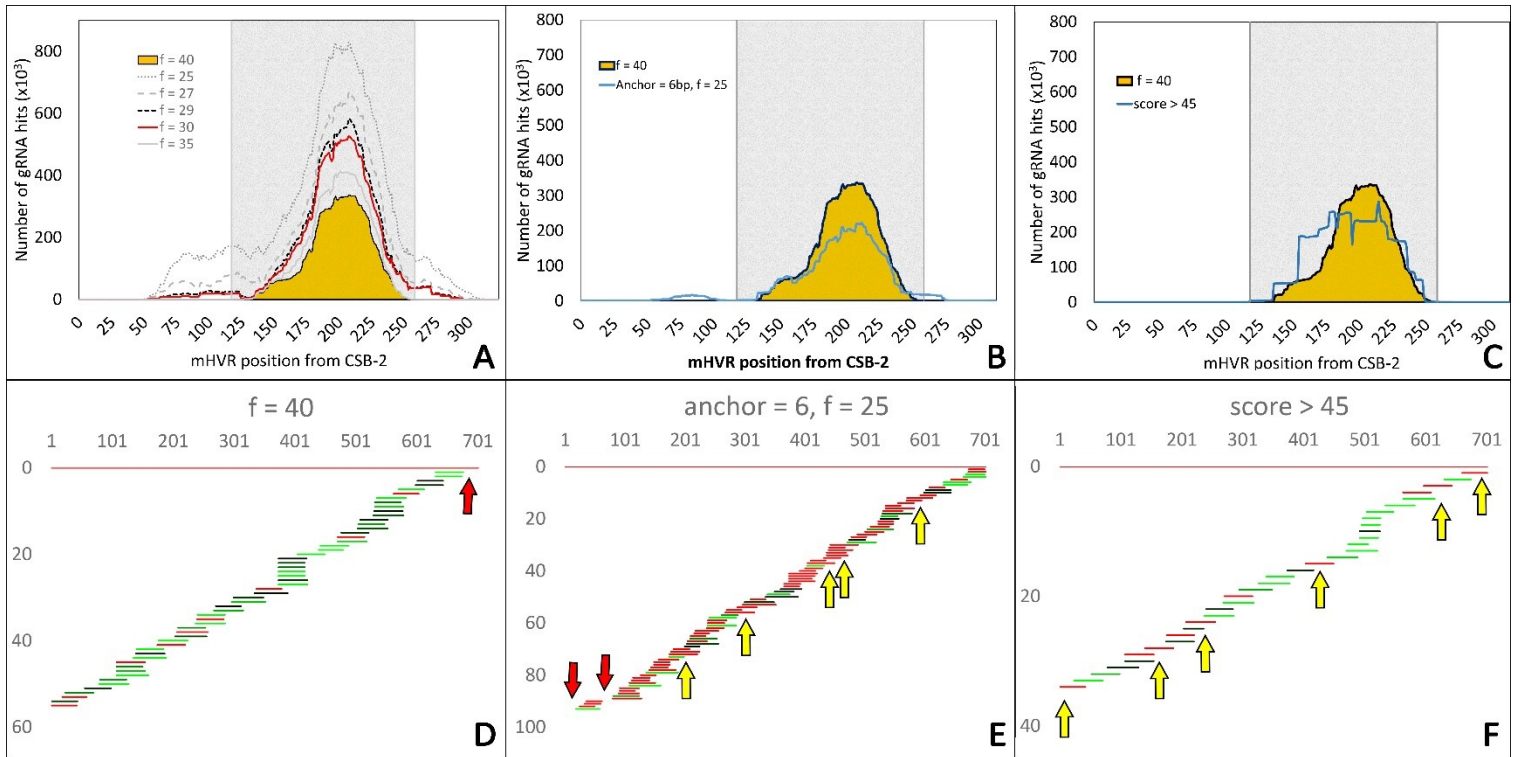

**Figure S3.** Evaluation of different filters strategies to discard false positive gRNA hits in strain X109/2. A-C, the number of gRNA hits is represented as the number of gRNA bases mapping to a position on the mHVR after applying different filters. The grey-shadow area indicates the gRNA cassette defined by a conservative filter (discarding gRNAs with length <40. i.e.,  $f = 40$ ). Different lines show the applied filter. A, filters only based on the number of bases on the gRNA. B, filter based on the detection of a 6bp anchor and  $f = 25$  (blue line) compared to  $f = 40$ . C, filter based on scoring base pairing (canonical =2 and non-canonical =1) and filtering gRNAs with a scoring sum < 45. D-F, editing cascades for ATPase 6 mRNA in strain X109/2 after applying different filters. gRNA classes are shown aligned below the fully edited mRNA (top red line). The x-axis indicates mRNA position, and the y-axis indicates the accumulated number of gRNA classes up to that mRNA position. gRNA classes are colored based on sequence abundance as follow: red (1-19 reads), black to green (20-1000 reads), light-green (>1000 reads). Red arrows indicate interrupted cascade and yellow arrows show regions with low level of coverage (<20 gRNA hits).

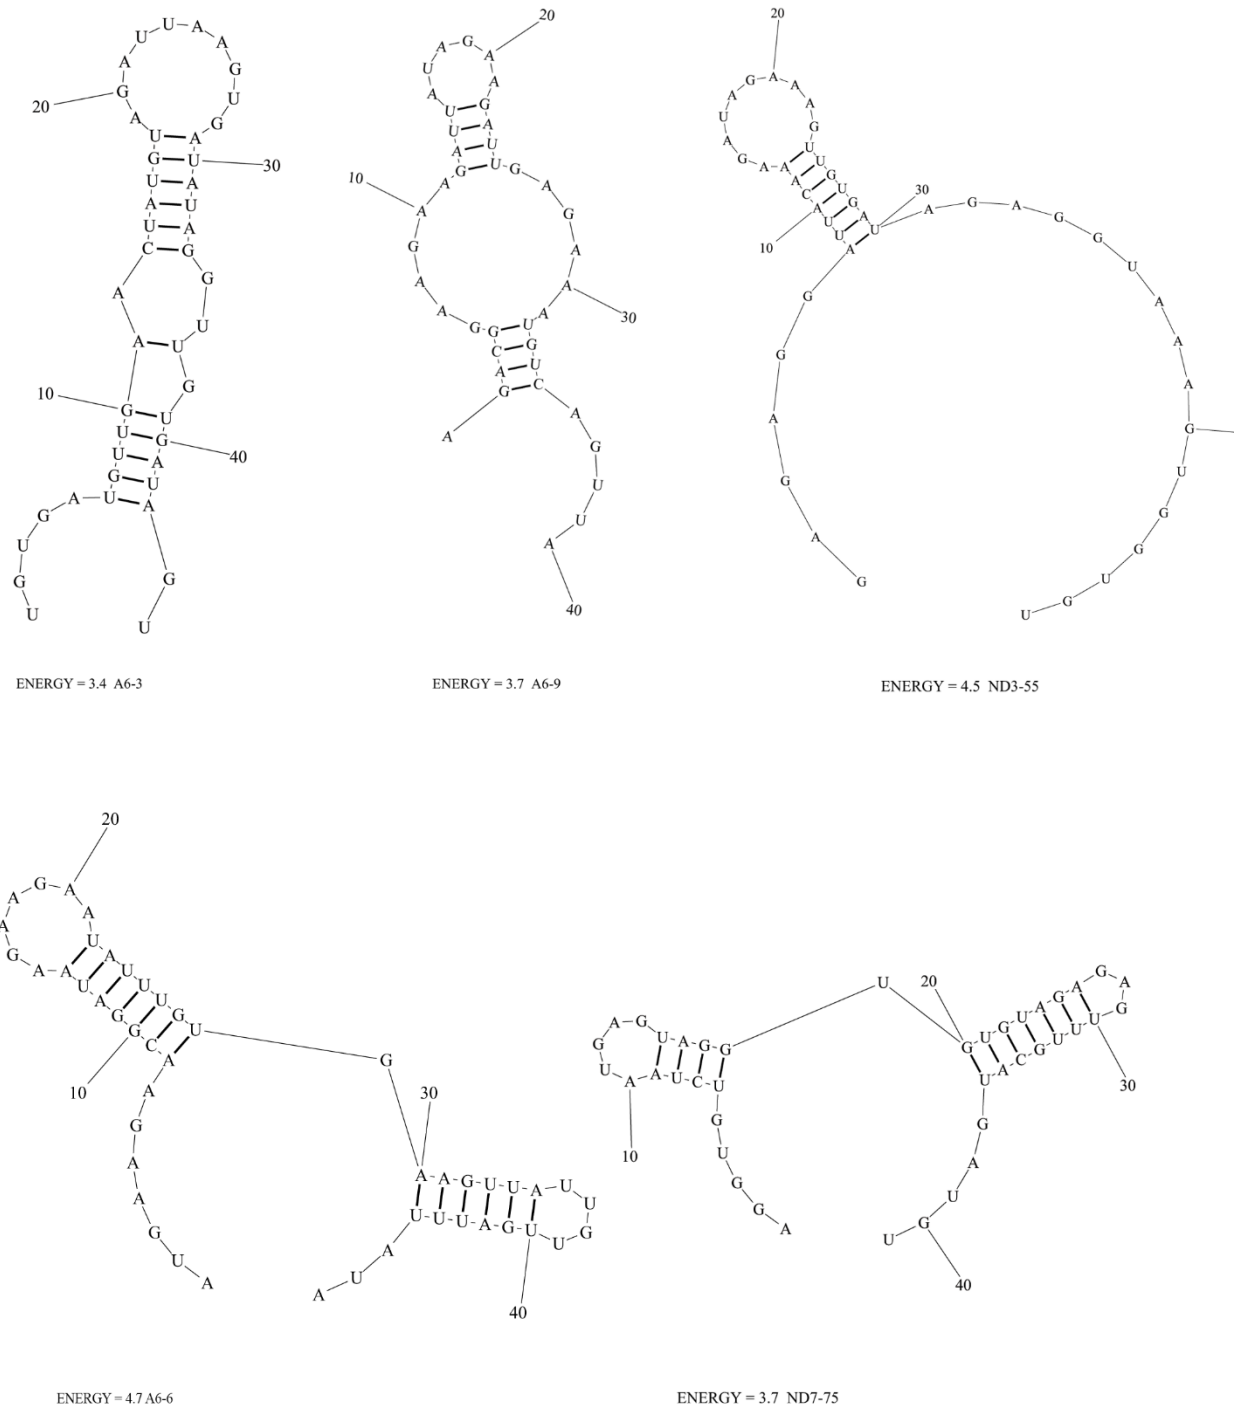

**Figure S4.** Representative secondary gRNA structures predicted from a subset of 89 gRNAs for all strains analyzed. Stems with two (left), one (mid, more frequent) or no internal loops (or bulges) and ending in a hairpin (figure top). Double hairpins (stem-loops) (figure bottom).

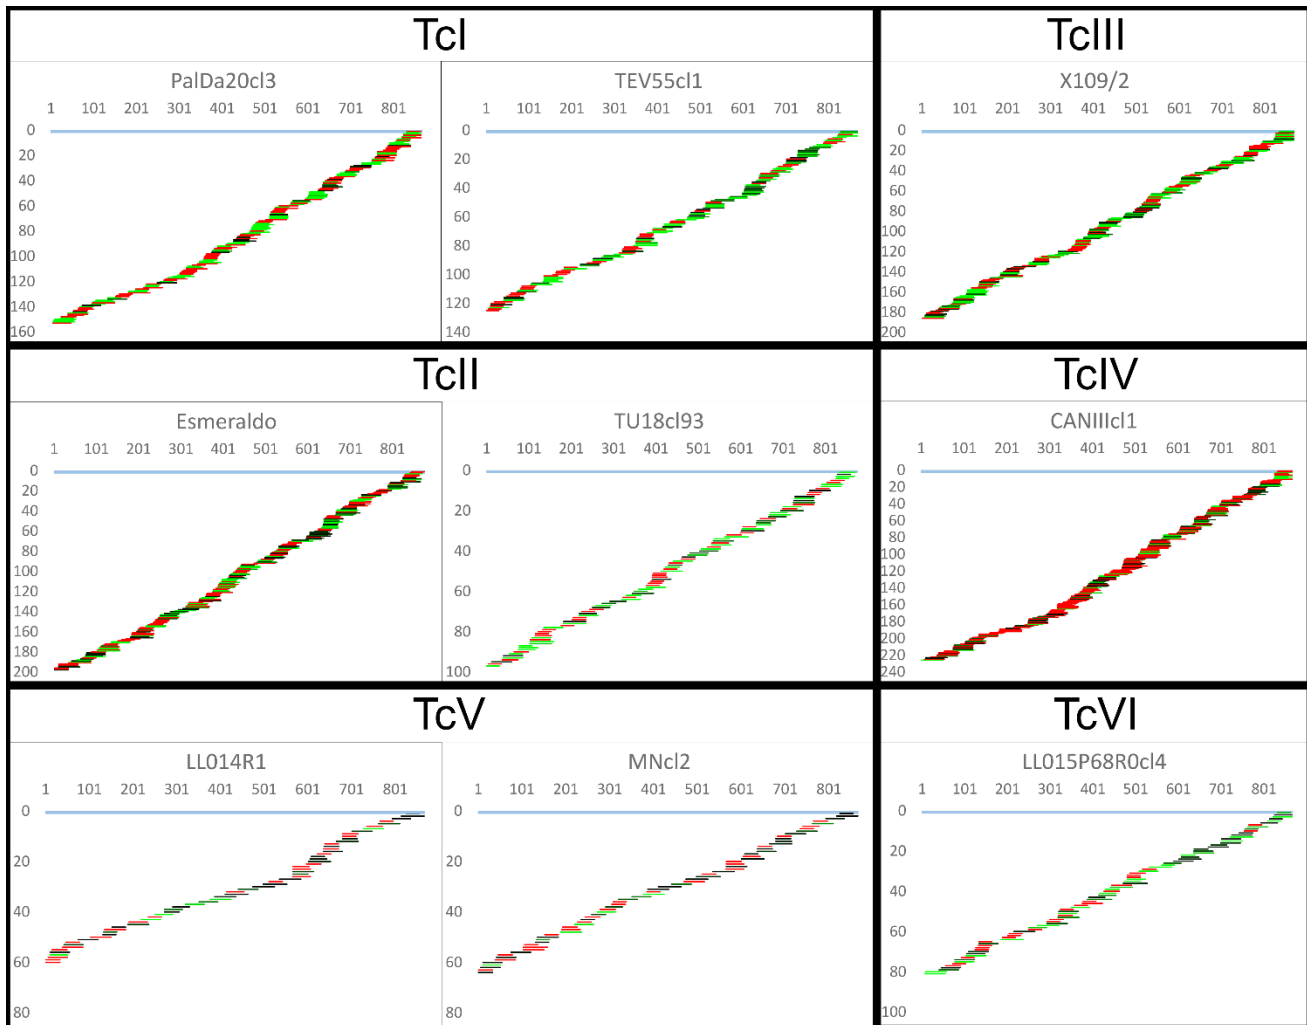

**Figure S5.** Canonical Cytochrome c oxidase subunit III mRNA editing cascade. gRNA classes are shown aligned below the fully edited mRNA (light blue). The x-axis indicates mRNA position, and the y-axis indicates the accumulated number of gRNA classes until such mRNA position. gRNA classes are colored based on sequence abundance as follow red (1-19 reads), black to green (20-1000 reads), light-green (>1000 reads).

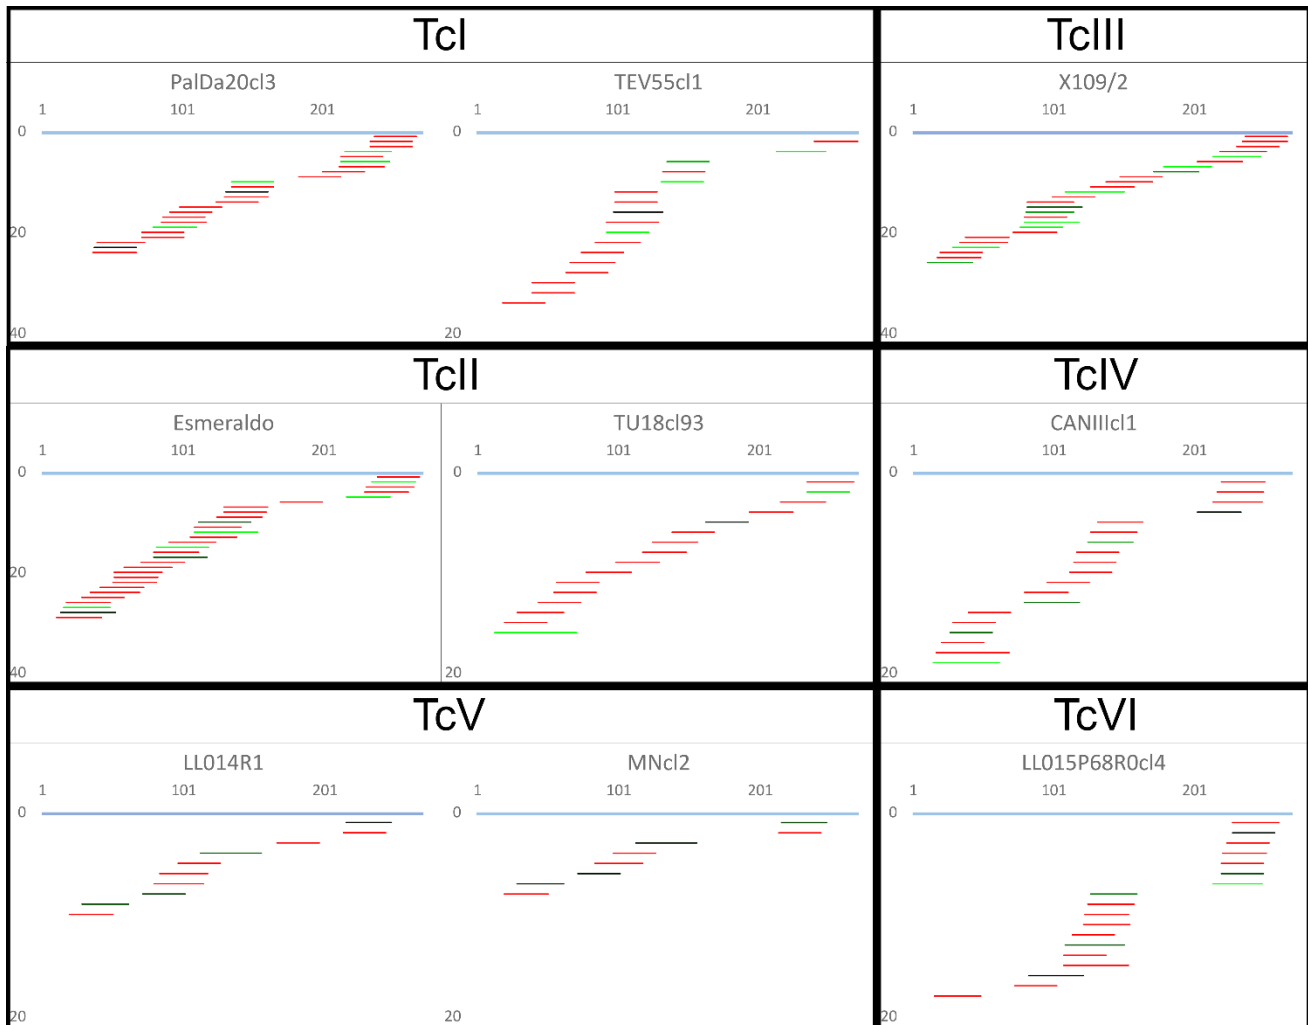

**Figure S6.** Incomplete editing cascade for NADH dehydrogenase subunit 3 (ND3). Detected gRNA classes are shown aligned below the fully edited mRNA (light blue). The x-axis indicates mRNA position, and the y-axis indicates the accumulated number of gRNA classes until such mRNA position. gRNA classes are colored based on sequence abundance as follow: red (1-19 reads), black to green (20-1000 reads), light green (>1000 reads).

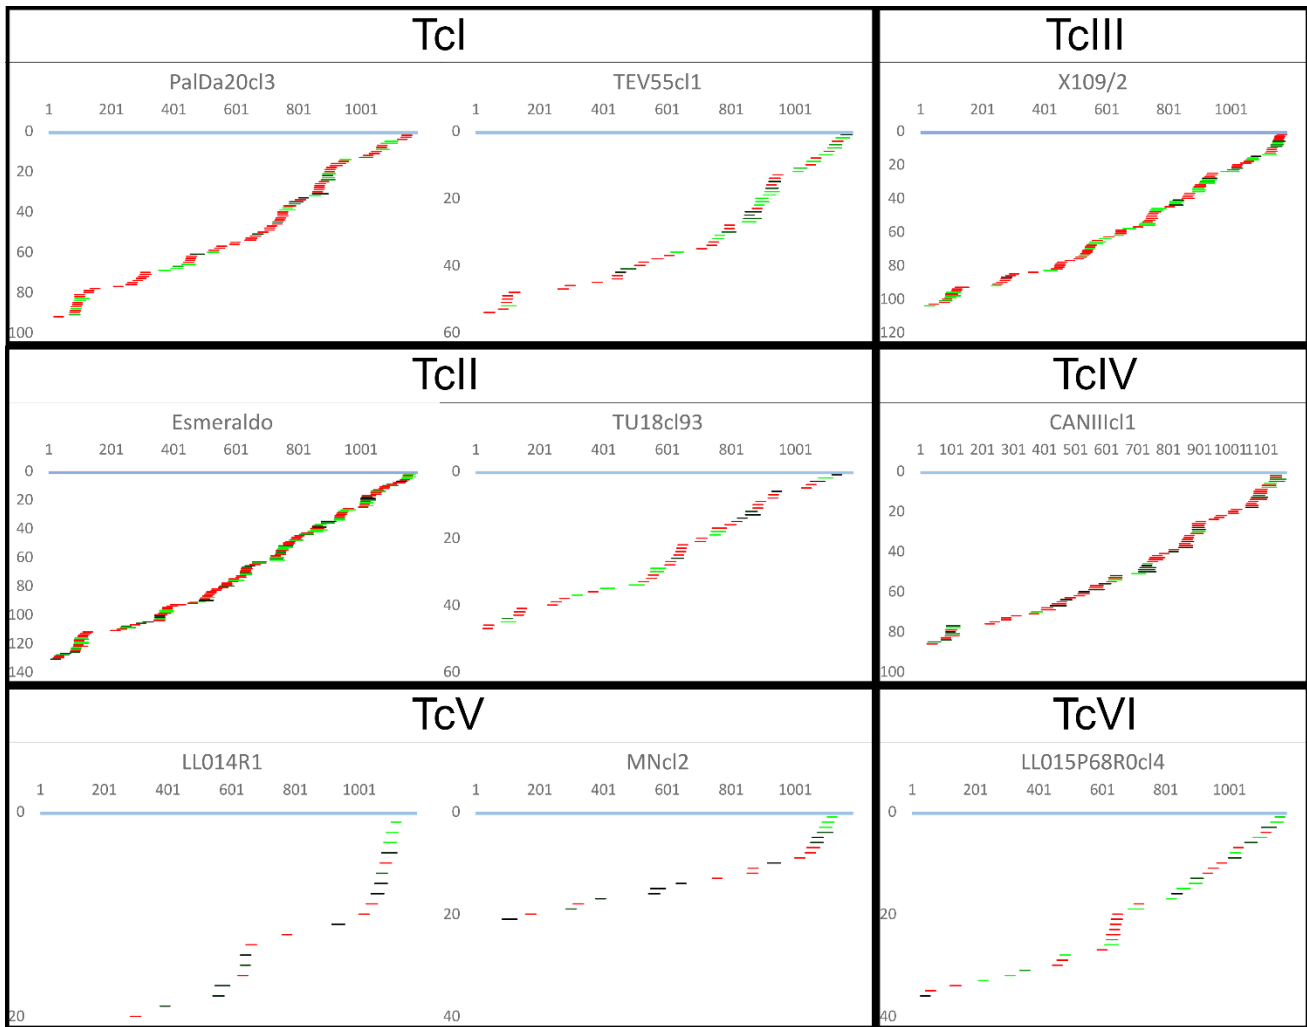

**Figure S7.** Incomplete editing cascade for NADH dehydrogenase subunit 7 (ND7). Detected gRNA classes are shown aligned below the fully edited mRNA (light blue). The x-axis indicates mRNA position, and the y-axis indicates the accumulated number of gRNA classes until such mRNA position. gRNA classes are colored based on sequence abundance as follow: red (1-19 reads), black to green (20-1000 reads), light-green (>1000 reads).

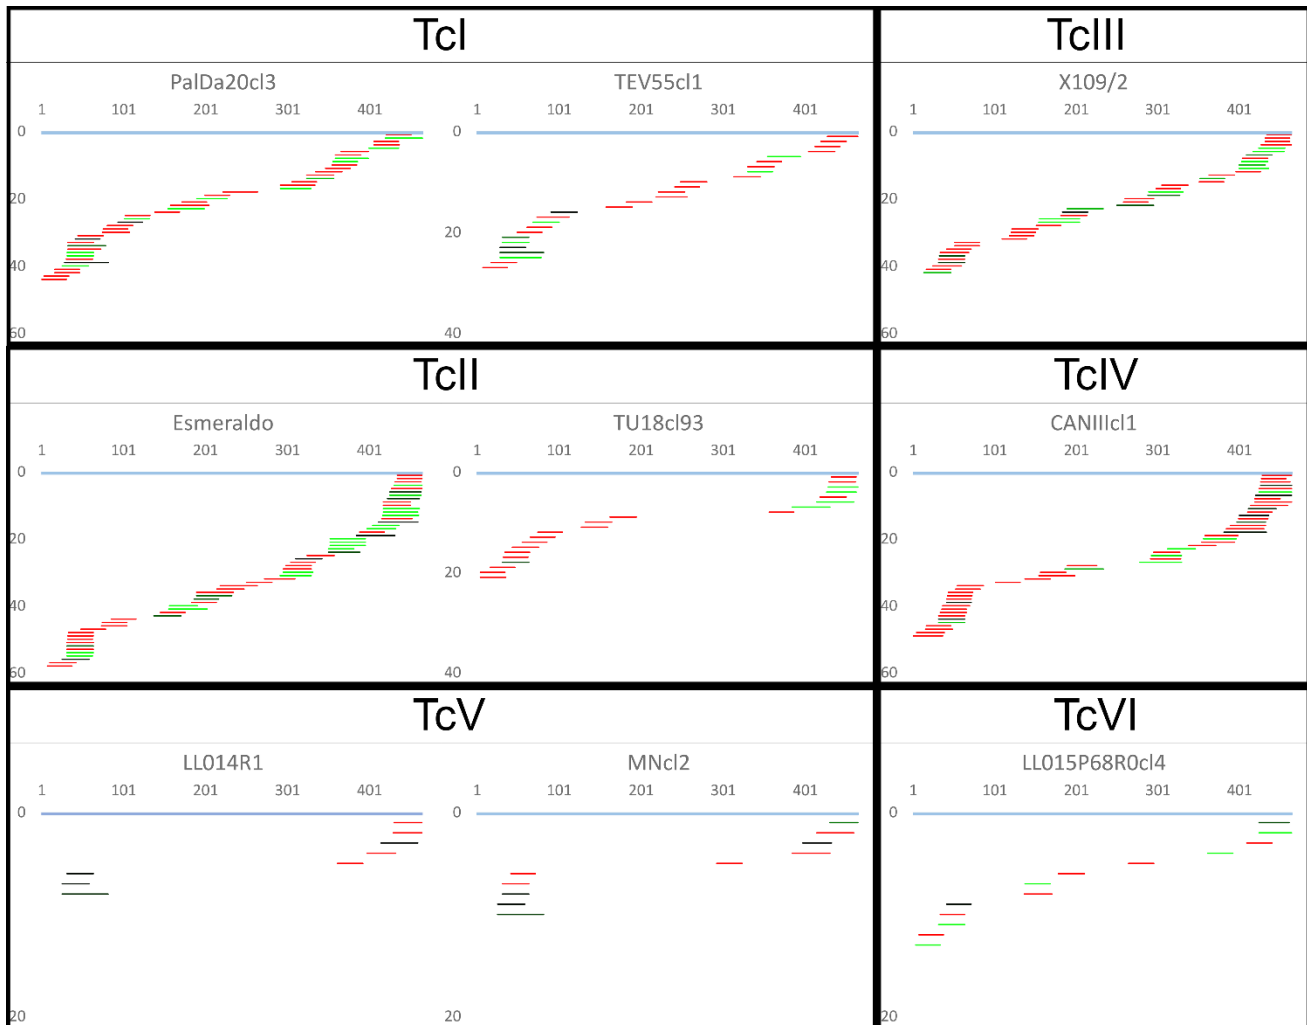

**Figure S8.** Incomplete editing cascade for NADH dehydrogenase subunit 8 (ND8). Detected gRNA classes are shown aligned below the fully edited mRNA (light blue). The x-axis indicates mRNA position, and the y-axis indicates the accumulated number of gRNA classes until such mRNA position. gRNA classes are colored based on sequence abundance as follow: red (1-19 reads), black to green (20-1000 reads), light-green (>1000 reads).



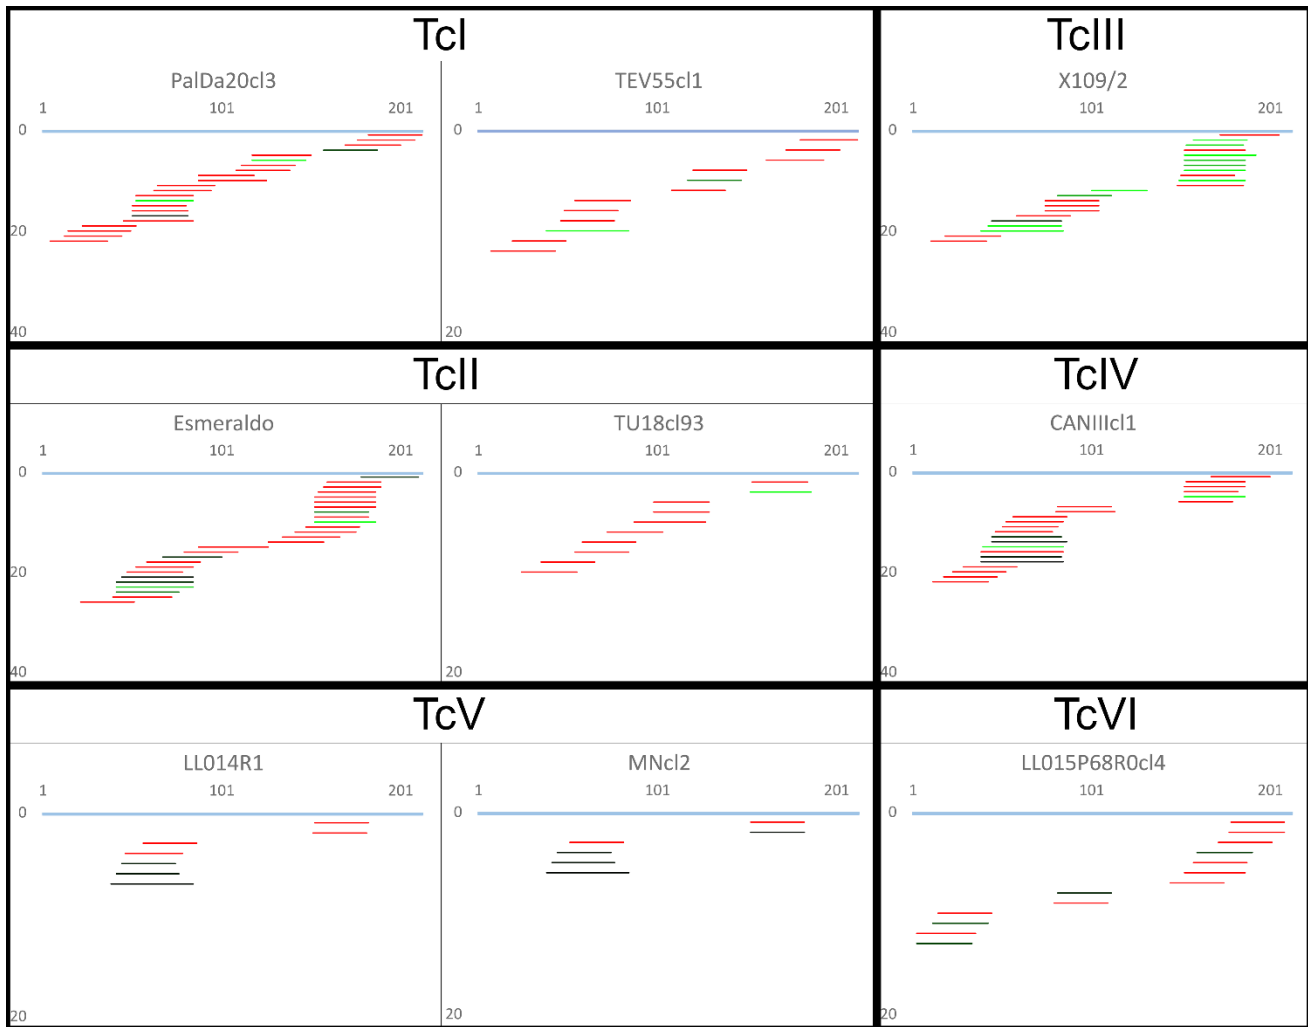

**Figure S9.** Incomplete editing cascade for CR3. Detected gRNA classes are shown aligned below the fully edited mRNA (light blue). The x-axis indicates mRNA position, and the y-axis indicates the accumulated number of gRNA classes until such mRNA position. gRNA classes are colored based on sequence abundance as follow: red (1-19 reads), black to green (20-1000 reads), light-green (>1000 reads).

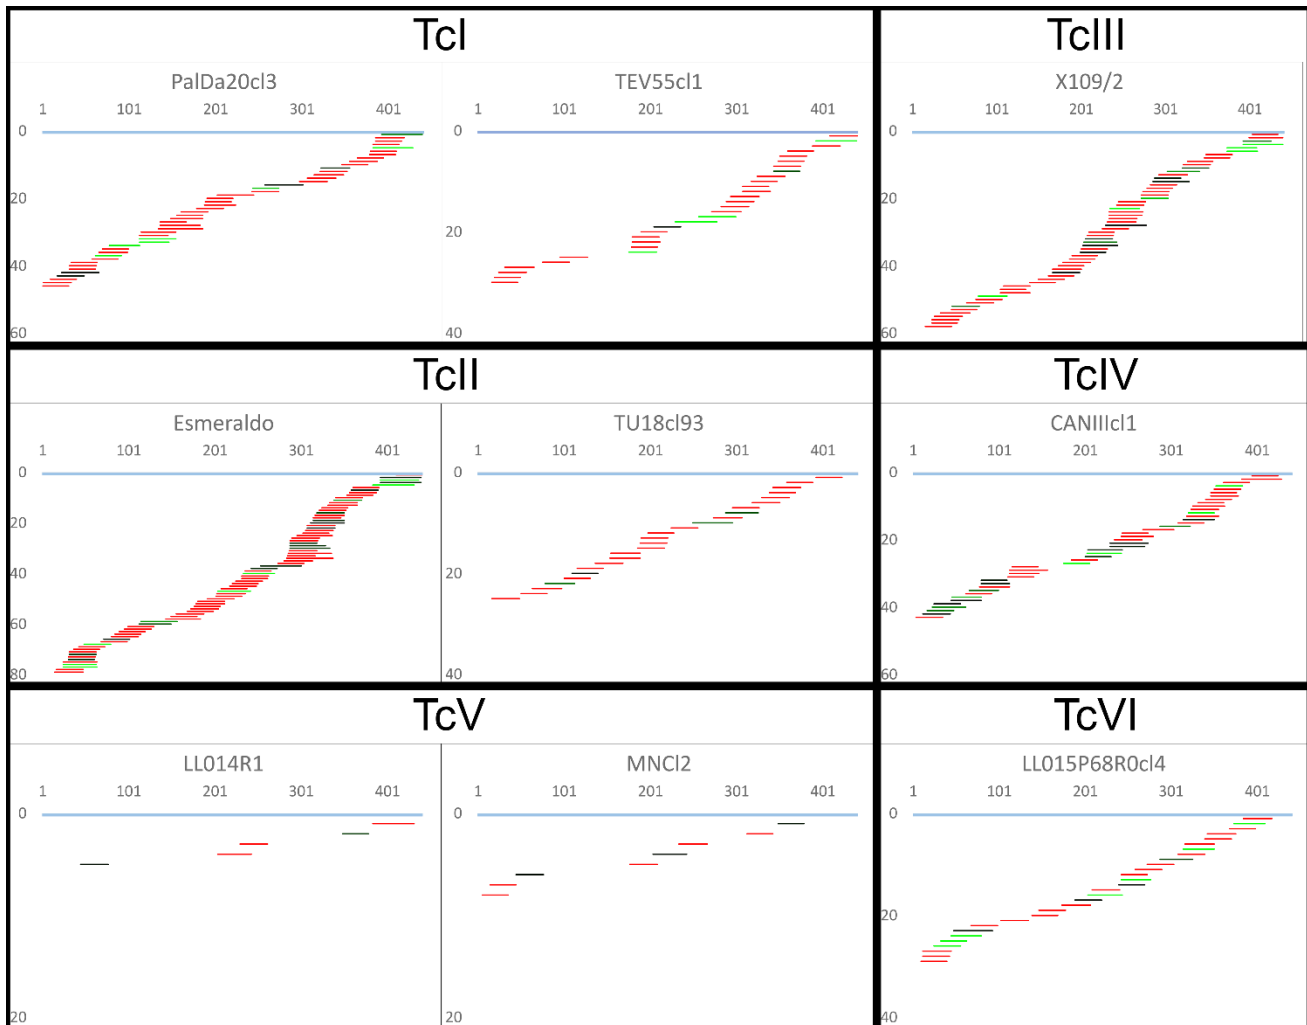

**Figure S10.** Incomplete editing cascade for CR4. Detected gRNA classes are shown aligned below the fully edited mRNA (light blue). The x-axis indicates mRNA position, and the y-axis indicates the accumulated number of gRNA classes until such mRNA position. gRNA classes are colored based on sequence abundance as follow: red (1-19 reads), black to green (20-1000 reads), light-green (>1000 reads).

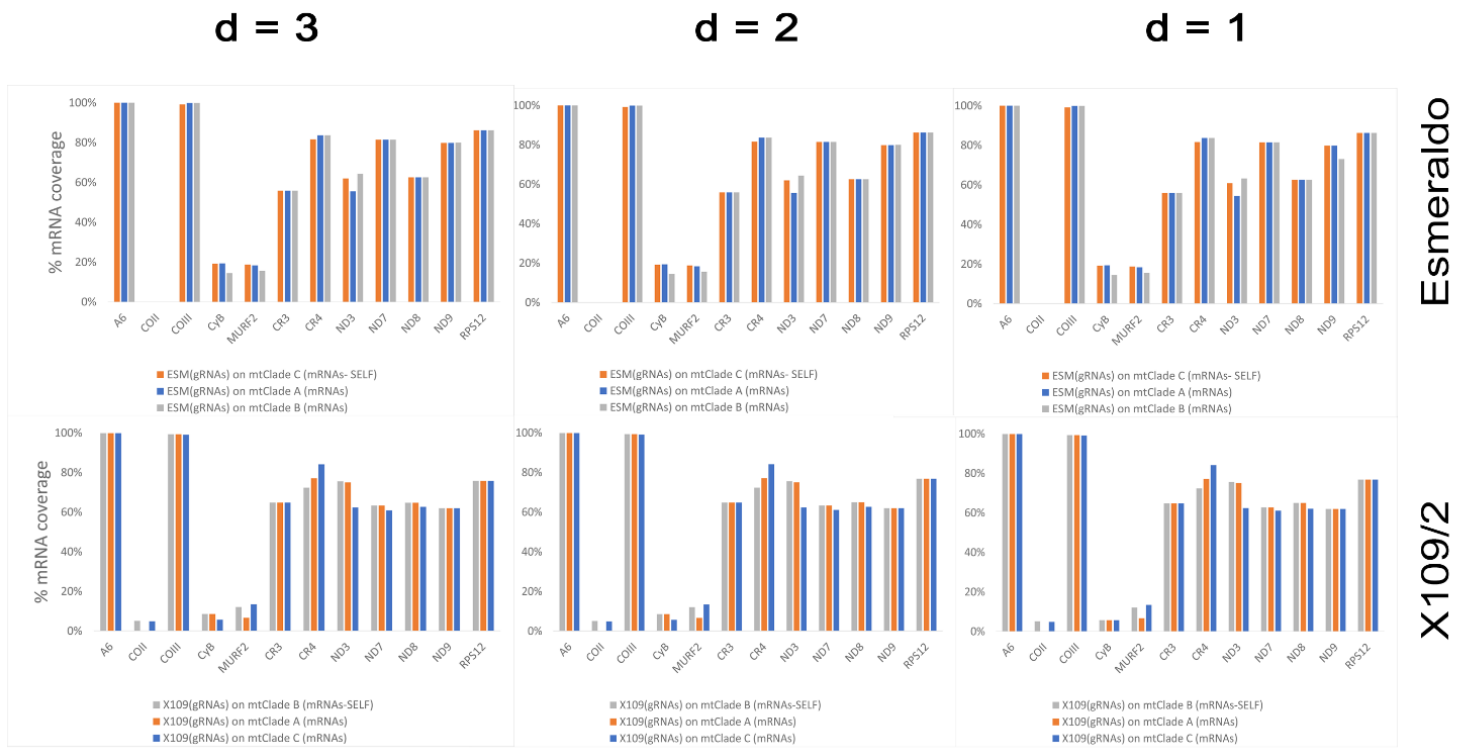

**Figure S11.** A gRNA repertoire could edit mRNAs from different mitochondrial clades in different stringencies for gRNA class definition parameter (d). (A) mRNA coverage percentage by X109/2 gRNA repertoire inferred from mRNAs of different mitochondrial clades. (B) mRNA coverage percentage by Esmeraldo gRNA repertoire inferred from mRNAs of different mitochondrial clades.

## 2.2. Supplementary Tables

Table S1. Number of gRNA detected and gRNA classes using predicted mRNAs from other strains\* of the same DTU and compared to the references used in this paper.

|                 | <b>Tcl</b><br>(mHVRs PalDa20cl3) |                      | <b>TcII</b><br>(mHVRs Esmeraldo) |                         | <b>TcIII</b><br>(mHVRs X109/2) |                         |
|-----------------|----------------------------------|----------------------|----------------------------------|-------------------------|--------------------------------|-------------------------|
|                 | mRNAs from<br>Colombiana         | mRNAs from<br>Sylvio | mRNAs from<br>S23b               | mRNAs from<br>Esmeraldo | mRNAs<br>from 231              | mRNAs from<br>CL-Brener |
| gRNA hits       | 1,219,969                        | 1,214,475            | 679,744                          | 693,075                 | 777,688                        | 801,591                 |
| gRNA<br>classes | 236                              | 234                  | 402                              | 401                     | 326                            | 319                     |

\*Sequences were obtained from Reis-Cunha et al. (41). Strains Colombiana(Tcl), S23b(TcII) and 231(TcIII) were analyzed since they have highest pairwise distance to Sylvio, Esmeraldo and CL Brener, respectively.

Table S2. Number of mHVR clusters in different states for coding gRNAs

| mHVR clusters with gRNA hits in: | PalDa | TEV | TU18 | ESM | X109 | CAN | MN | LL014 | LL015 |
|----------------------------------|-------|-----|------|-----|------|-----|----|-------|-------|
| >75% reads                       | 156   | 136 | 89   | 195 | 207  | 64  | 31 | 39    | 75    |
| <10% reads                       | 164   | 96  | 60   | 151 | 164  | 83  | 25 | 9     | 32    |
| >10% & < 75%                     | 4     | 2   | 2    | 1   | 2    | 2   | 15 | 24    | 1     |

Table S3. Number of gRNA classes detected for each mRNA.

|        | <b>ESM</b> | <b>TU18</b> | <b>PALDA</b> | <b>TEV</b> | <b>X109</b> | <b>CAN</b> | <b>MN</b> | <b>LL014</b> | <b>LL015</b> |
|--------|------------|-------------|--------------|------------|-------------|------------|-----------|--------------|--------------|
| A6     | 102        | 34          | 42           | 38         | 63          | 54         | 26        | 23           | 44           |
| COII*  | 0          | 1           | 1            | 2          | 1           | 2          | 1         | 1            | 1            |
| COIII  | 114        | 61          | 85           | 82         | 118         | 95         | 38        | 37           | 55           |
| CyB*   | 10         | 3           | 7            | 1          | 3           | 2          | 3         | 0            | 2            |
| MURF2* | 7          | 6           | 7            | 2          | 4           | 5          | 4         | 4            | 3            |
| CR3    | 8          | 1           | 4            | 2          | 12          | 5          | 3         | 3            | 4            |
| CR4    | 25         | 4           | 11           | 6          | 18          | 19         | 3         | 2            | 10           |
| ND3    | 8          | 3           | 6            | 5          | 10          | 5          | 4         | 4            | 6            |
| ND7    | 60         | 17          | 28           | 26         | 40          | 33         | 13        | 15           | 20           |
| ND8    | 26         | 5           | 16           | 9          | 17          | 15         | 5         | 4            | 7            |
| ND9    | 26         | 11          | 19           | 10         | 15          | 20         | 8         | 6            | 7            |
| RPS12  | 15         | 10          | 8            | 12         | 18          | 12         | 7         | 5            | 6            |

\*partially edited

Table S4. Correlation coefficient between the number of gRNAs editing a particular (pan-edited) mRNA and the number of gRNAs editing a another different (pan-edited) mRNA. Each value is calculated comparing gRNA classes for each mRNA pairs across difrent strains.

|       | COIII | CR3  | CR4  | ND3  | ND7  | ND8  | ND9  | RPS12 |
|-------|-------|------|------|------|------|------|------|-------|
| A6    | 0.82  | 0.70 | 0.93 | 0.73 | 0.98 | 0.93 | 0.84 | 0.72  |
| COIII |       | 0.75 | 0.88 | 0.79 | 0.89 | 0.89 | 0.82 | 0.91  |
| CR3   |       |      | 0.76 | 0.95 | 0.73 | 0.71 | 0.51 | 0.75  |
| CR4   |       |      |      | 0.76 | 0.93 | 0.94 | 0.87 | 0.73  |
| ND3   |       |      |      |      | 0.76 | 0.76 | 0.51 | 0.73  |
| ND7   |       |      |      |      |      | 0.97 | 0.87 | 0.78  |
| ND8   |       |      |      |      |      |      | 0.94 | 0.72  |
| ND9   |       |      |      |      |      |      |      | 0.63  |

Table S5. Percentage of coverage of mRNA sequence by different gRNA classes

|        | PalDa | TEV  | TU18 | ESM  | X109 | CAN  | MN   | LL014 | LL015 |
|--------|-------|------|------|------|------|------|------|-------|-------|
| A6     | 100%  | 100% | 98%  | 100% | 100% | 100% | 100% | 100%  | 99%   |
| COII*  | 55%   | 37%  | 37%  | 41%  | 34%  | 42%  | 18%  | 10%   | 21%   |
| COIII  | 100%  | 100% | 100% | 100% | 100% | 100% | 100% | 100%  | 99%   |
| CyB*   | 55%   | 41%  | 43%  | 53%  | 58%  | 31%  | 21%  | 17%   | 34%   |
| MURF2* | 64%   | 59%  | 54%  | 71%  | 77%  | 47%  | 24%  | 25%   | 35%   |
| CR3    | 95%   | 82%  | 66%  | 89%  | 85%  | 73%  | 37%  | 38%   | 66%   |
| CR4    | 100%  | 84%  | 91%  | 97%  | 96%  | 93%  | 51%  | 39%   | 91%   |
| ND3    | 79%   | 76%  | 94%  | 86%  | 94%  | 70%  | 60%  | 71%   | 63%   |
| ND7    | 85%   | 71%  | 73%  | 92%  | 87%  | 83%  | 42%  | 36%   | 62%   |
| ND8    | 93%   | 82%  | 60%  | 94%  | 85%  | 86%  | 37%  | 34%   | 55%   |
| ND9    | 92%   | 81%  | 87%  | 98%  | 98%  | 94%  | 57%  | 47%   | 68%   |
| RPS12  | 93%   | 98%  | 86%  | 88%  | 94%  | 90%  | 74%  | 74%   | 91%   |

\*partially edited

Table S6. Percentage of coverage of mRNA sequence by different gRNA classes (> 20 gRNAs per gRNA class)

|       | PalDa | TEV  | TU18 | ESM  | X109 | CAN | MN  | LL014 | LL015 |
|-------|-------|------|------|------|------|-----|-----|-------|-------|
| A6    | 99%   | 100% | 96%  | 100% | 100% | 97% | 87% | 87%   | 99%   |
| COII  | 5%    | 10%  | 6%   | 0%   | 5%   | 8%  | 5%  | 5%    | 5%    |
| COIII | 99%   | 99%  | 100% | 100% | 99%  | 98% | 98% | 97%   | 99%   |
| CyB   | 16%   | 3%   | 8%   | 19%  | 9%   | 6%  | 9%  | 0%    | 5%    |
| MURF2 | 21%   | 6%   | 18%  | 19%  | 12%  | 14% | 12% | 10%   | 9%    |
| CR3   | 46%   | 37%  | 16%  | 56%  | 65%  | 39% | 31% | 22%   | 49%   |
| CR4   | 66%   | 46%  | 32%  | 82%  | 72%  | 67% | 24% | 15%   | 59%   |
| ND3   | 50%   | 40%  | 44%  | 61%  | 75%  | 56% | 52% | 52%   | 45%   |
| ND7   | 53%   | 45%  | 44%  | 81%  | 64%  | 55% | 27% | 28%   | 45%   |
| ND8   | 74%   | 34%  | 25%  | 63%  | 65%  | 57% | 27% | 22%   | 37%   |
| ND9   | 76%   | 44%  | 45%  | 80%  | 62%  | 67% | 33% | 35%   | 29%   |
| RPS12 | 72%   | 88%  | 77%  | 86%  | 77%  | 75% | 64% | 57%   | 69%   |
